# Supplementary material for: Post annealing induced manipulation of phase and upconversion luminescence of Cr3+ doped NaYF4:Yb,Er crystals
Source: Royal Society of Chemistry journal article supplement (doi:10.1039/c9ra00115h), 2019-01-01
Supplement: c9ra00115h1.pdf [file c9ra00115h1.pdf]

## Supplementary Material (ESI)

### Post annealing induced manipulation of phase and upconversion luminescence of Cr<sup>3+</sup> doped NaYF<sub>4</sub>:Yb,Er crystals†

Shivanand H. Nannuri,<sup>a</sup> Suresh D. Kulkarni,<sup>a,b</sup> Subash C.K.,<sup>c</sup> Santhosh Chidangil,<sup>a,d</sup> and Sajan D. George,<sup>a,b</sup>

<sup>a</sup>Department of Atomic and Molecular Physics, Manipal Academy of Higher Education, Manipal, Karnataka, India - 576104

<sup>b</sup>Centre for Applied Nanosciences, , Manipal Academy of Higher Education, Manipal, Karnataka, India – 576104

<sup>c</sup>School of Nanoscience and Technology, National Institute of Technology, Calicut, India – 673 601

<sup>d</sup>Centre for Biophotonics, Manipal Academy of Higher Education, Manipal, Karnataka, India - 576104

#### Contents

- Experimental setup for emission collection
- FESEM Images
- Summarized pseudo phase diagram (T vs mol% Cr)
- Emission spectra of Cr<sup>3+</sup> doped NaYF<sub>4</sub>:Yb, Er annealed at different temperatures
- Laser power density dependent emission spectra of all samples.

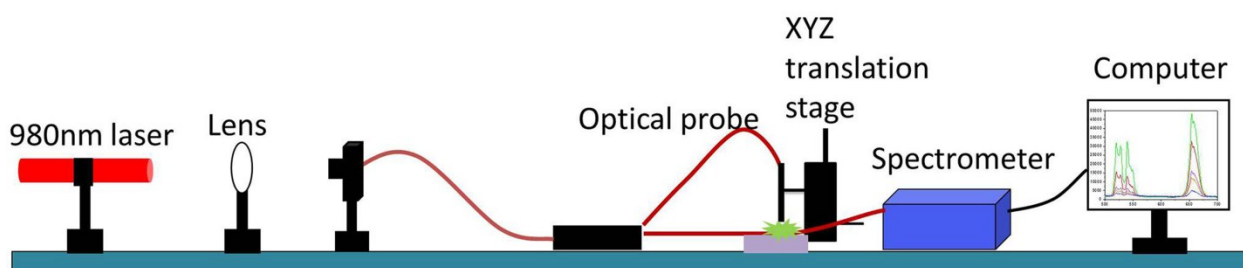

**Fig.S1. Fiber coupled excitation-collection laser (980 nm) based experimental setup.**

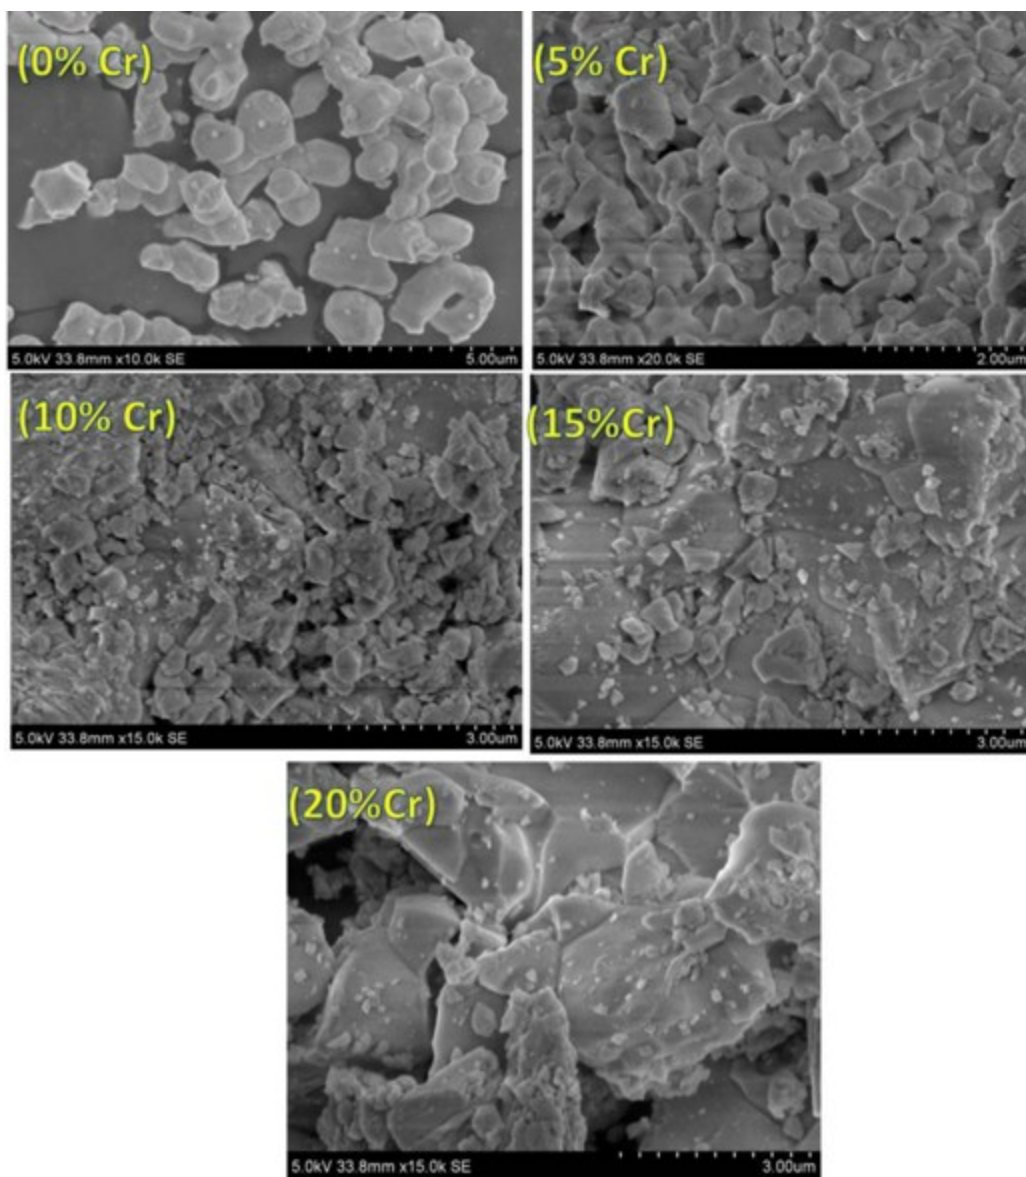

**Fig.S2.** FESEM images of the NaYF<sub>4</sub>:Yb<sup>3+</sup>/Er<sup>3+</sup> crystals codoped with different amount of Cr<sup>3+</sup> ions annealed at 600 °C : (a) 0 mol%, (b) 5 mol%, (c)10 mol%, (d)15 mol%, (e) 20 mol%.

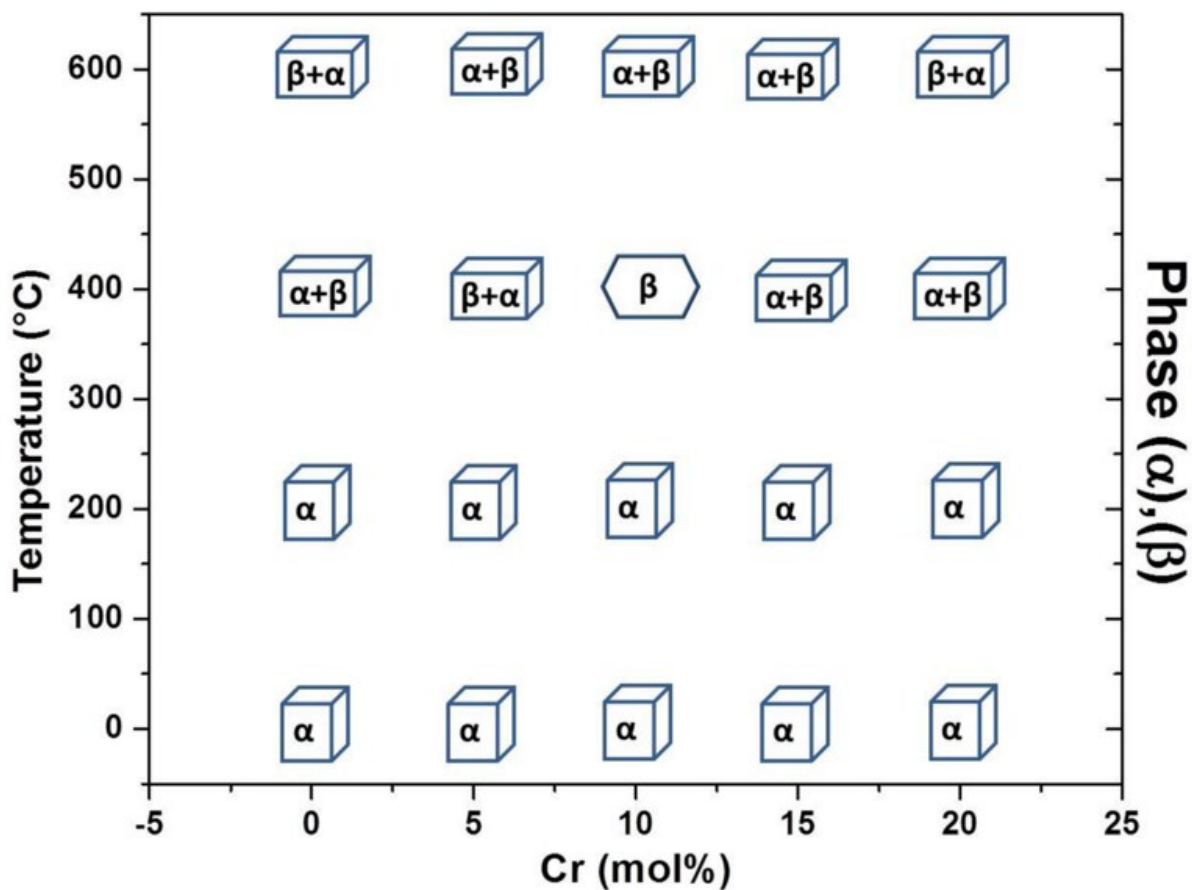

Fig.S3. Summarized pseudo phase diagram (T vs mol% Cr)

Fig.S3 Show the summarized pseudo phase diagram obtained from the XRD data. Here  $\alpha$  refers to the pure cubic phase,  $\beta$  refers to pure hexagonal phase, ( $\alpha+\beta$ ) and ( $\beta+\alpha$ ) refers to cubic phase dominant mixed phase and hexagonal phase dominant mixed phase respectively.

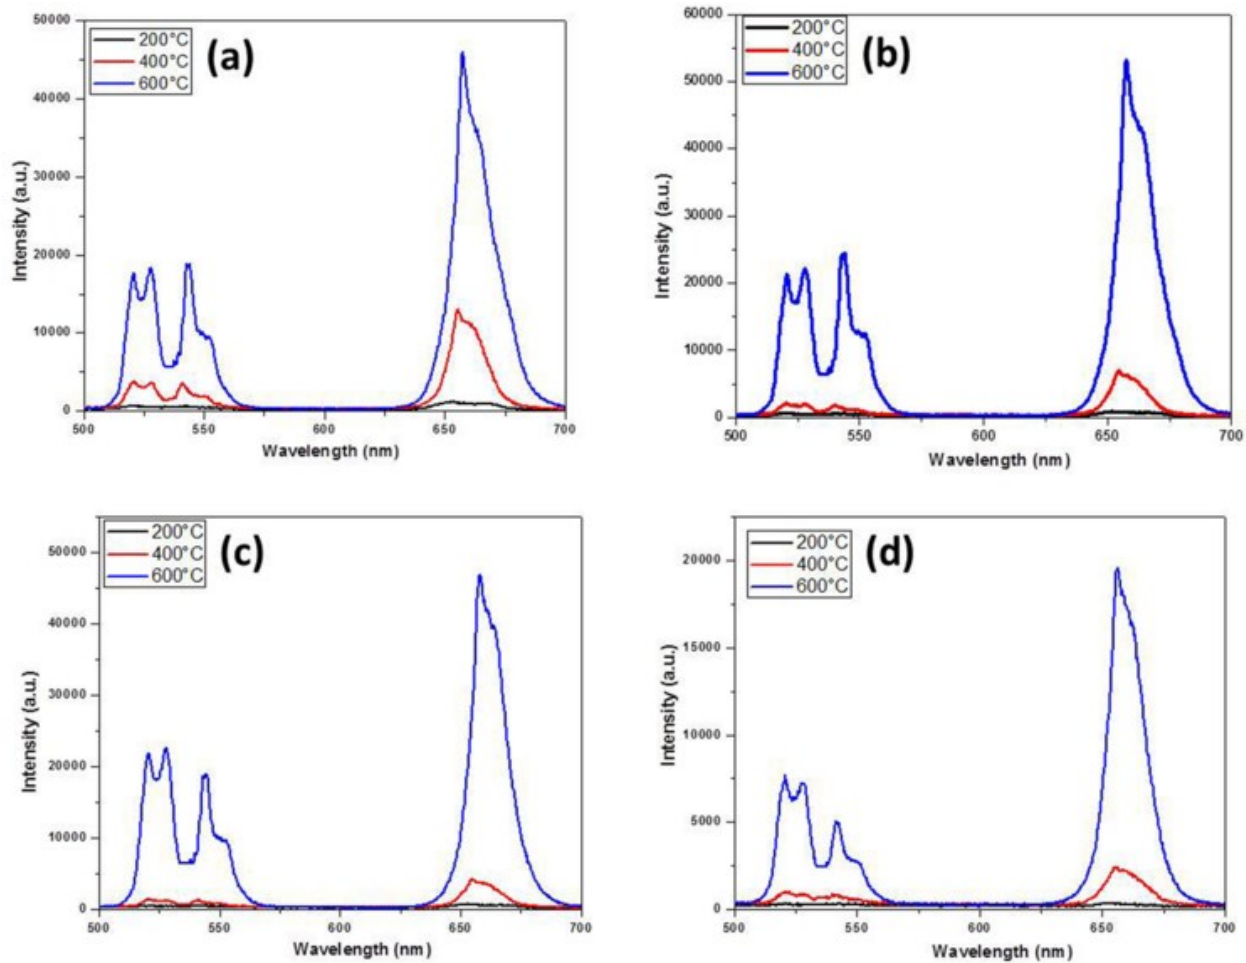

**Fig.S4.** Emission spectra of the  $\text{NaYF}_4:\text{Yb}^{3+}/\text{Er}^{3+}$  crystals codoped with different amount of  $\text{Cr}^{3+}$  ions annealed at different temperature: (a) 5 mol%, (b) 10 mol%, (c) 15 mol%, (d) 20 mol%.

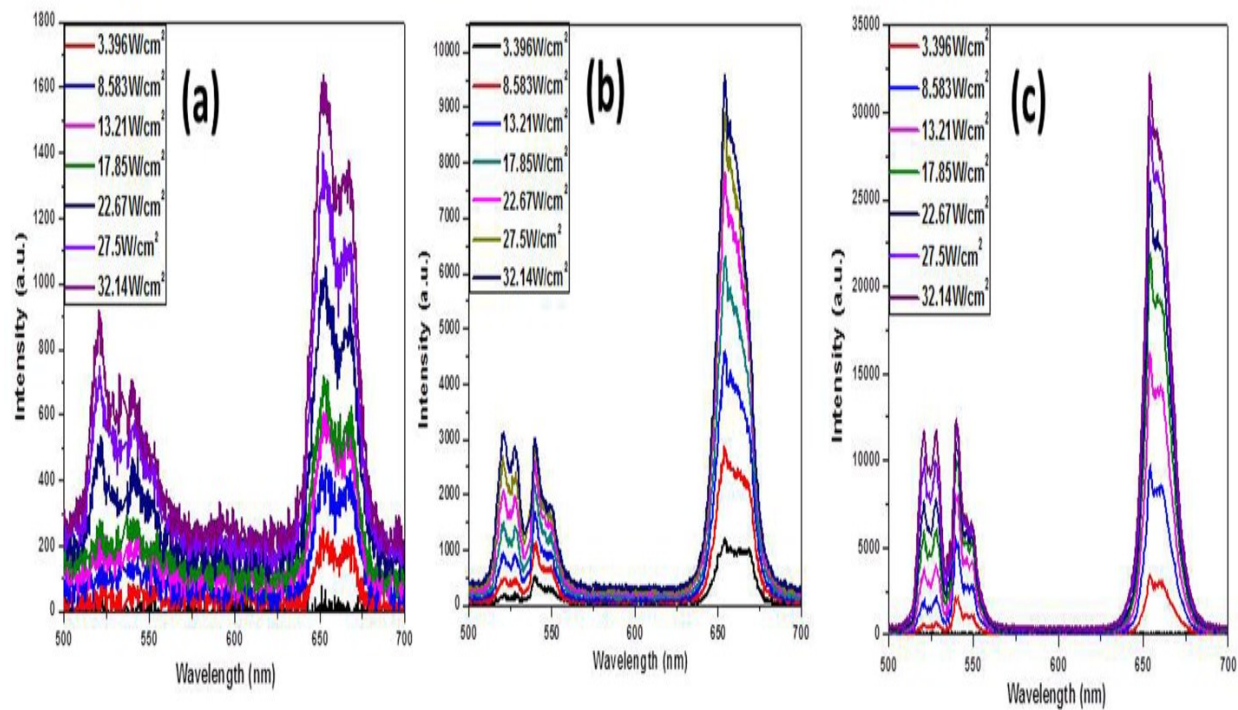

**Fig.S5. Laser power dependence emission spectra of NaYF<sub>4</sub>:Yb<sup>3+</sup>/Er<sup>3+</sup> crystals annealed at different temperature: (a) 200°C, (b) 400°C, (C) 600°C.**

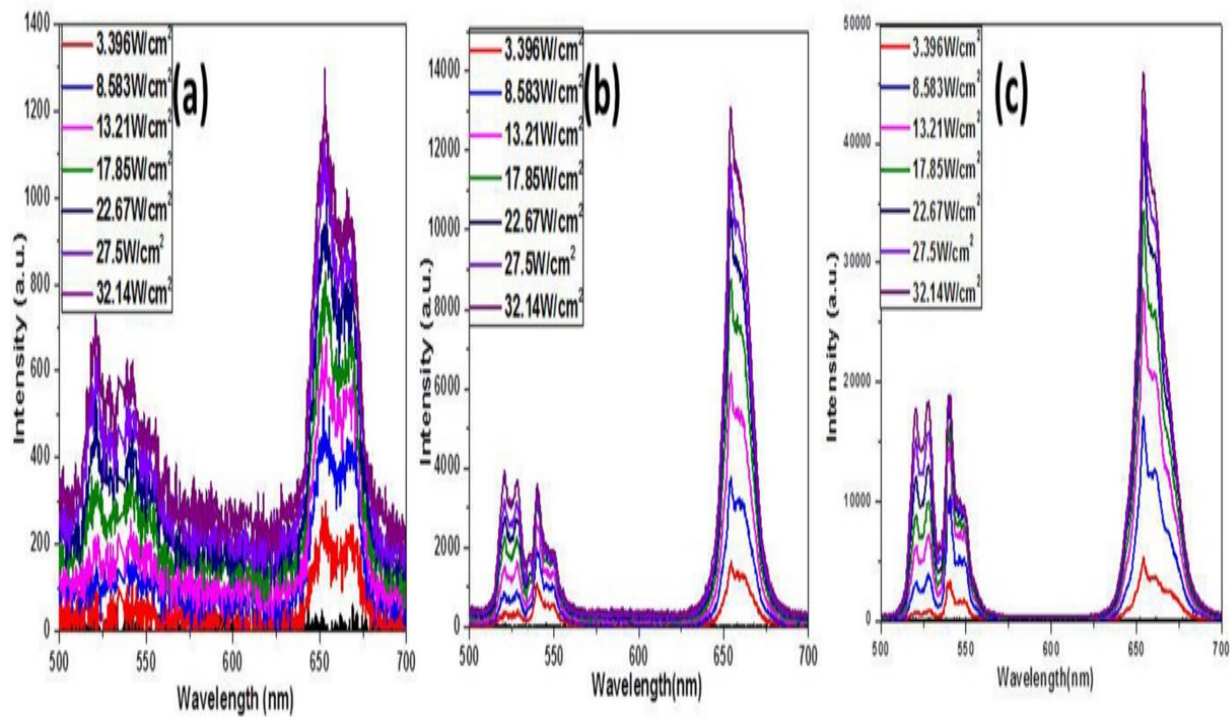

**Fig.S6. Laser power dependence emission spectra of 5 mol% Cr<sup>3+</sup> doped NaYF<sub>4</sub>:Yb<sup>3+</sup>/Er<sup>3+</sup> microcrystals annealed at different temperature: (a) 200°C, (b) 400°C, (c) 600°C.**



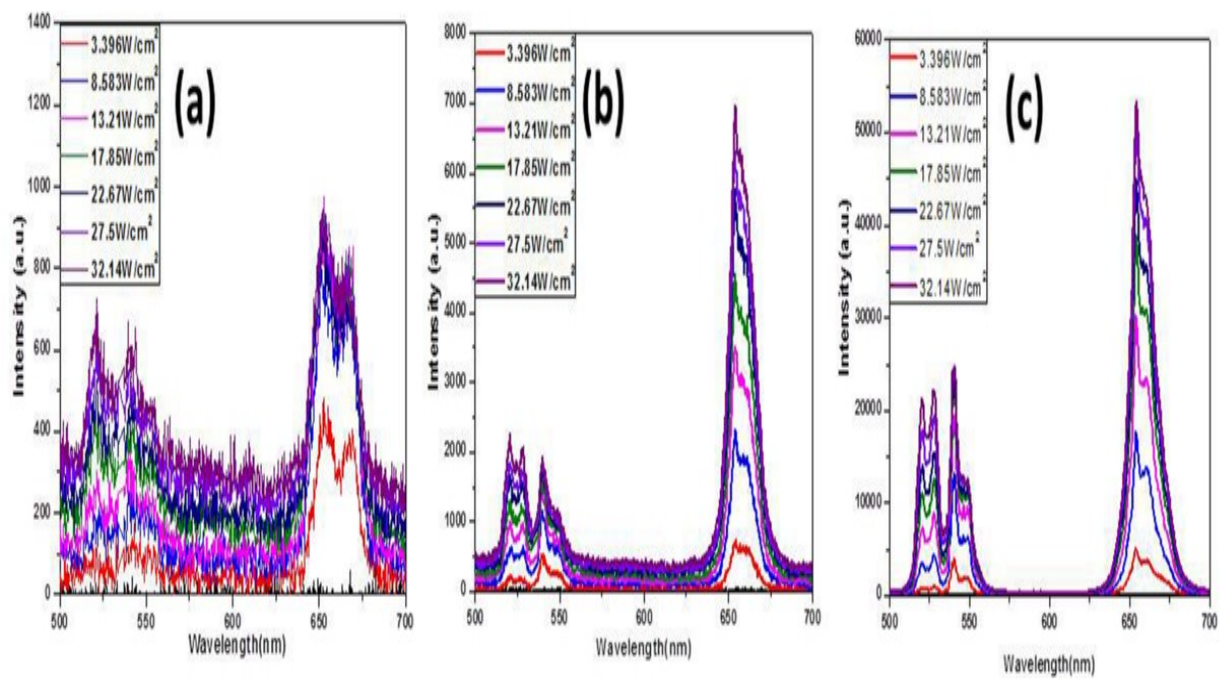

**Fig.S7. Laser power dependence emission spectra of 10 mol% Cr<sup>3+</sup> doped NaYF<sub>4</sub>:Yb<sup>3+</sup>/Er<sup>3+</sup> crystals annealed at different temperature: (a) 200°C, (b) 400°C, (C) 600°C.**

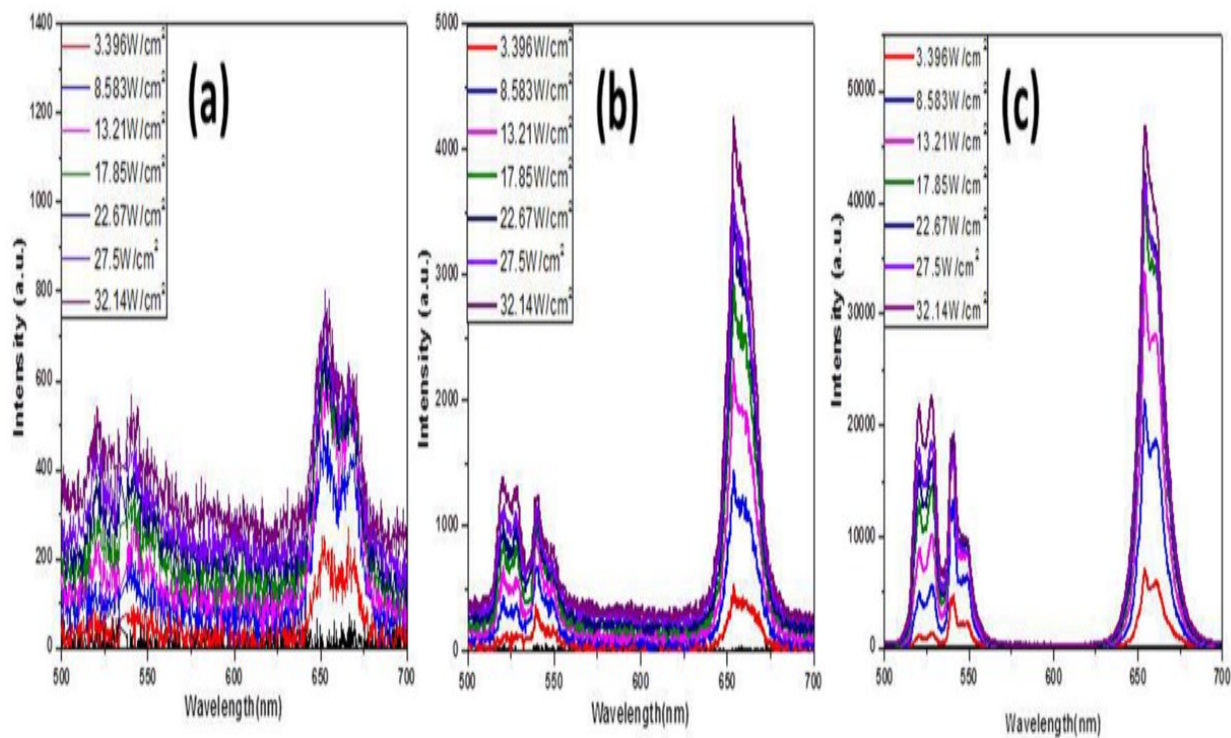

**Fig.S8. Laser power dependence emission spectra of 15 mol% Cr<sup>3+</sup> doped NaYF<sub>4</sub>:Yb<sup>3+</sup>/Er<sup>3+</sup> crystals annealed at different temperature: (a) 200°C, (b) 400°C, (c) 600°C**



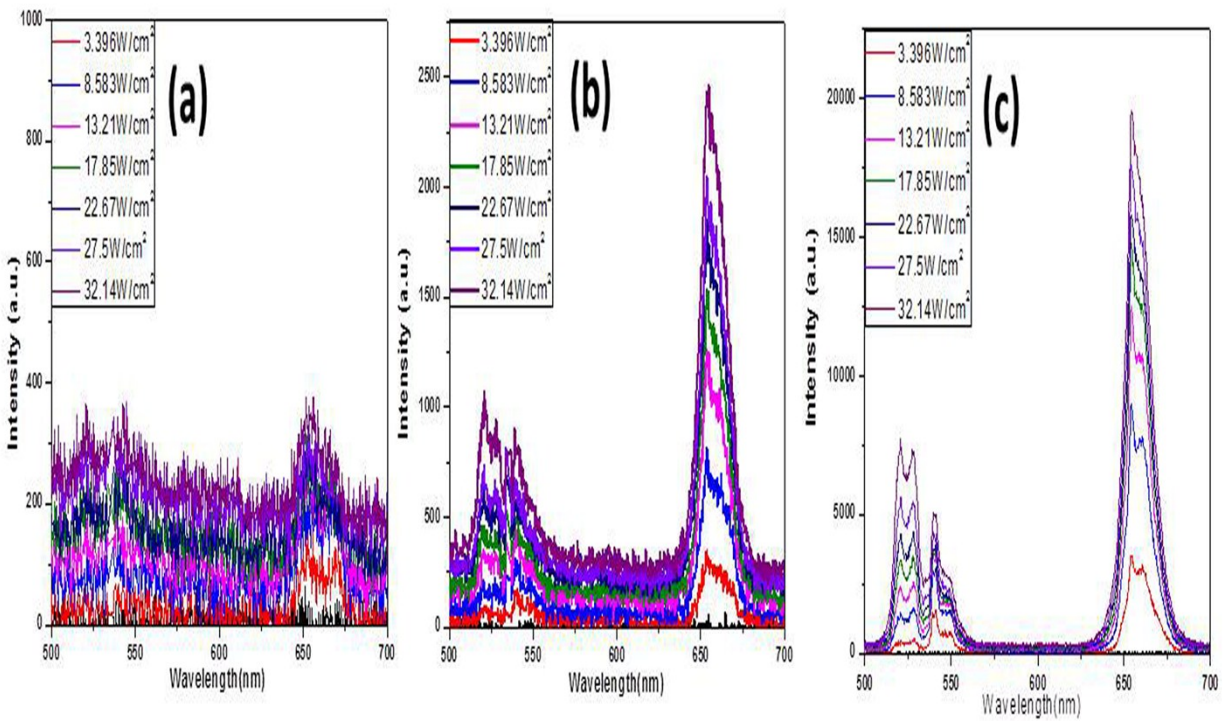

**Fig.S9. Laser power dependence emission spectra of 20 mol% Cr<sup>3+</sup> doped NaYF<sub>4</sub>:Yb<sup>3+</sup>/Er<sup>3+</sup> crystals annealed at different temperature: (a) 200°C, (b) 400°C, (c) 600°C.**
